# Supplementary material for: Interfacial synergy of Pt cocatalyst and oxygen defective Bi2MoO6 for boosting the photocatalytic redox reaction
Source: Royal Society of Chemistry journal article supplement (doi:10.1039/d2se01455f), 2022-12-21
Supplement: d2se01455f1.pdf [file d2se01455f1.pdf]

## **Interfacial synergy of Pt cocatalyst and oxygen defective $\text{Bi}_2\text{MoO}_6$ for boosting photocatalytic redox reaction**

Xiaojing Yang<sup>†</sup>, Bao Zhang<sup>‡,\*</sup>, Taifeng Liu<sup>§</sup>, Zhenpan Chen<sup>#,\*</sup>,

<sup>†</sup>Key Laboratory of Natural Medicine and Immune-Engineering of Henan Province, Henan University, Kaifeng 475004, China

<sup>‡</sup>Key Lab for Special Functional Materials, Ministry of Education, National & Local Joint Engineering Research Center for High-efficiency Display and Lighting Technology, School of Materials Science and Engineering, and Collaborative Innovation Center of Nano Functional Materials and Applications, Henan University, Kaifeng 475004, China

<sup>§</sup>National & Local Joint Engineering Research Center for Applied Technology of Hybrid Nanomaterials, Henan University, Kaifeng 475004, China

<sup>#</sup>School of Chemical Engineering, Xiangtan University, Xiangtan, 411105, PR China

\*To whom correspondence should be addressed. Email: zhangbao@henu.edu.cn; zpchen@xtu.edu.cn

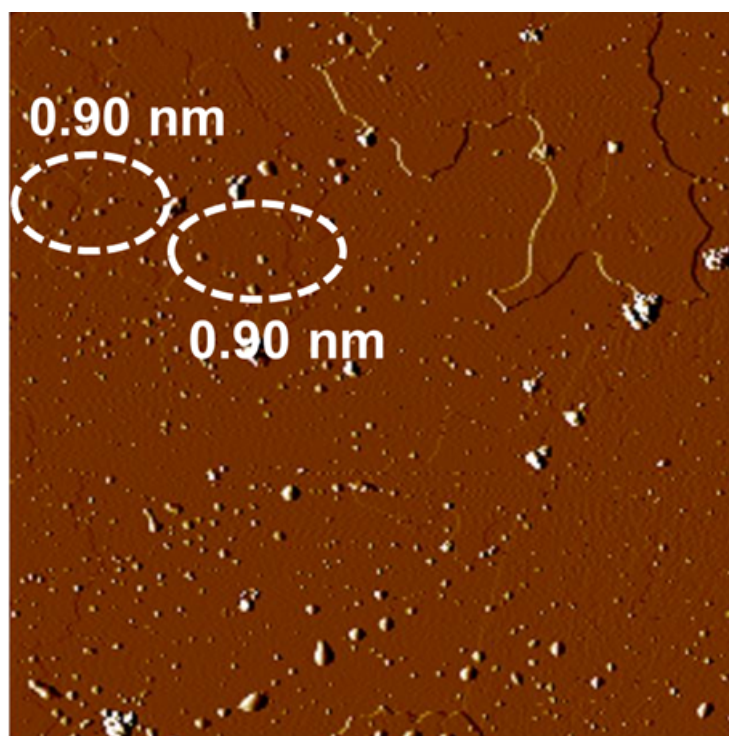

Fig. S1 AFM image of Bi<sub>2</sub>MoO<sub>6</sub>-V<sub>2</sub>O<sub>5</sub> catalyst

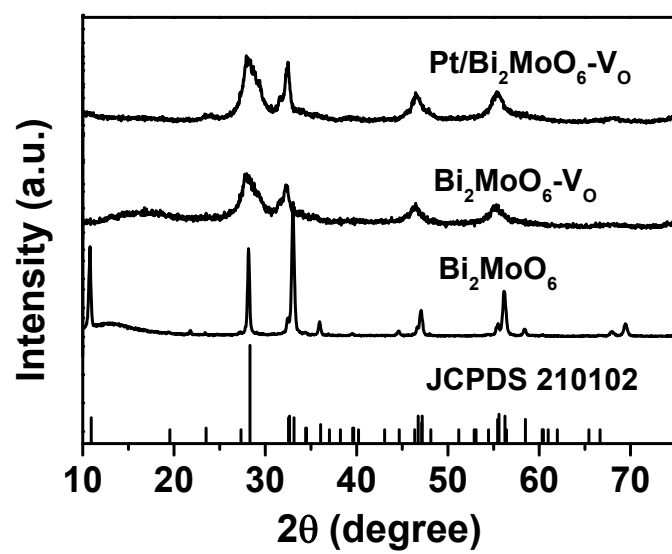

Fig. S2 XRD patterns of Bi<sub>2</sub>MoO<sub>6</sub> samples

Table S1 The concentration of surface oxygen vacancies ( $V_O$ ) and lattice oxygen ( $O_{latt}$ ) for  $Bi_2MoO_6$  catalysts

| Catalysts           | $V_O / (V_O + O_{latt})$ | $O_{latt} / (O_{latt} + V_O)$ |
|---------------------|--------------------------|-------------------------------|
| $Bi_2MoO_6$         | 0.15                     | 0.85                          |
| $Bi_2MoO_6-V_O$     | 0.20                     | 0.80                          |
| Pt/ $Bi_2MoO_6-V_O$ | 0.37                     | 0.63                          |

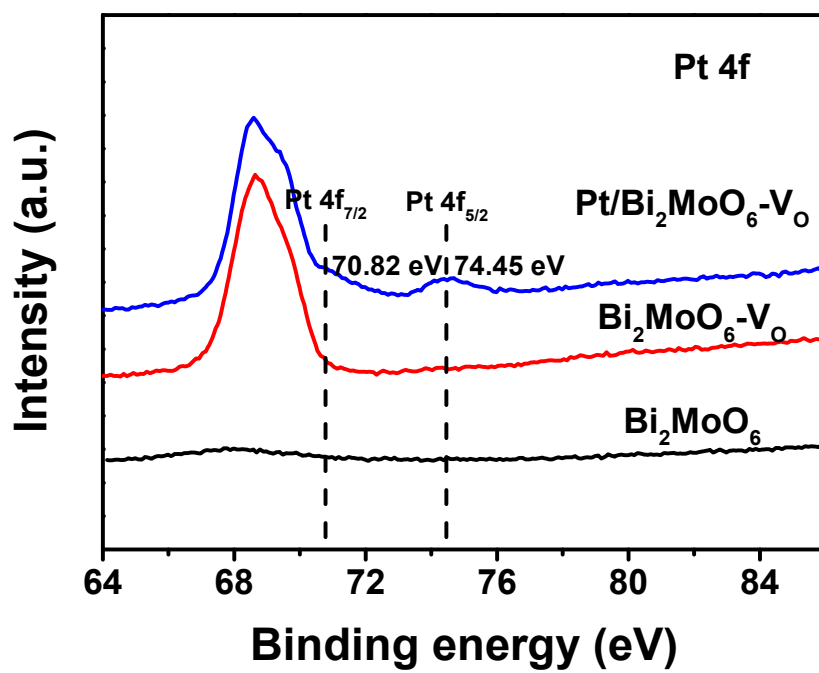

Fig. S3 Pt 4f XPS spectra of Bi<sub>2</sub>MoO<sub>6</sub> samples

Table S2 Black experiments

| Entry | Light | Photocatalyst | O <sub>2</sub> | Conversion rate (%) | Selectivity (%) |
|-------|-------|---------------|----------------|---------------------|-----------------|
| 1     | +     | +             | +              | 41                  | 99              |
| 2     | -     | +             | +              | <1                  | -               |
| 3     | +     | -             | +              | <1                  | -               |
| 4     | +     | +             | -              | <1                  | -               |

Reaction conditions: Pt/Bi<sub>2</sub>MoO<sub>6</sub>-V<sub>O</sub> catalyst, 10 mg; benzyl alcohol, 0.1 mmol; C<sub>6</sub>H<sub>5</sub>CF<sub>3</sub>, 1.5 mL; reaction time, 1 h; O<sub>2</sub>, 0.1 MPa.

Table S3 The photoactivity of Bi<sub>2</sub>MoO<sub>6</sub> photocatalyst reported in the literature so far

| Reference | Catalyst                                            | Catalyst mass (mg) | Conversion rate (%) | Time (h) | Photoactivity (mmol g <sup>-1</sup> h <sup>-1</sup> ) | Selectivity (%) |
|-----------|-----------------------------------------------------|--------------------|---------------------|----------|-------------------------------------------------------|-----------------|
| 1         | Pt/Bi <sub>2</sub> MoO <sub>6</sub> -glycerol       | 10                 | 36                  | 1        | 3.6                                                   | 99              |
| 2         | Bi <sub>2</sub> MoO <sub>6</sub> spheres            | 16                 | 38                  | 4        | 0.6                                                   | 99              |
| 3         | Pd(0.05)/BMO-SOVs                                   | 20                 | 58                  | 3        | 0.97                                                  | 99              |
| This work | Pt/Bi <sub>2</sub> MoO <sub>6</sub> -V <sub>O</sub> | 10                 | 41                  | 1        | 4.1                                                   | 99              |

References:

1. B. Zhang, J. Li, Y. Y. Gao, R. F. Chong, Z. L. Wang, L. Guo, X. W. Zhang, C. Li, To boost photocatalytic activity in selective oxidation of alcohols on ultrathin Bi<sub>2</sub>MoO<sub>6</sub> nanoplates with Pt nanoparticles as cocatalyst, *J. Catal.*, 2017, **345**, 96-103.
2. K. Q. Jing, W. Ma, Y. H. Ren, J. H. Xiong, B. B. Guo, Y. J. Song, S. J. Liang, L. Wu, Hierarchical Bi<sub>2</sub>MoO<sub>6</sub> spheres in situ assembled by monolayer nanosheets toward photocatalytic selective oxidation of benzyl alcohol, *Appl. Catal., B*, 2019, **243**, 10-18.
3. Z. L. Sun, X. L. Yang, X.-F. Yu, L. H. Xia, Y. H. Peng, Z. Li, Y. Zhang, J. B. Cheng, K. S. Zhang, J. Q. Yu, Surface oxygen vacancies of Pd/Bi<sub>2</sub>MoO<sub>6-x</sub> acts as "Electron Bridge" to promote photocatalytic selective oxidation of alcohol, *Appl. Catal., B*, 2021, **285**, 119790.

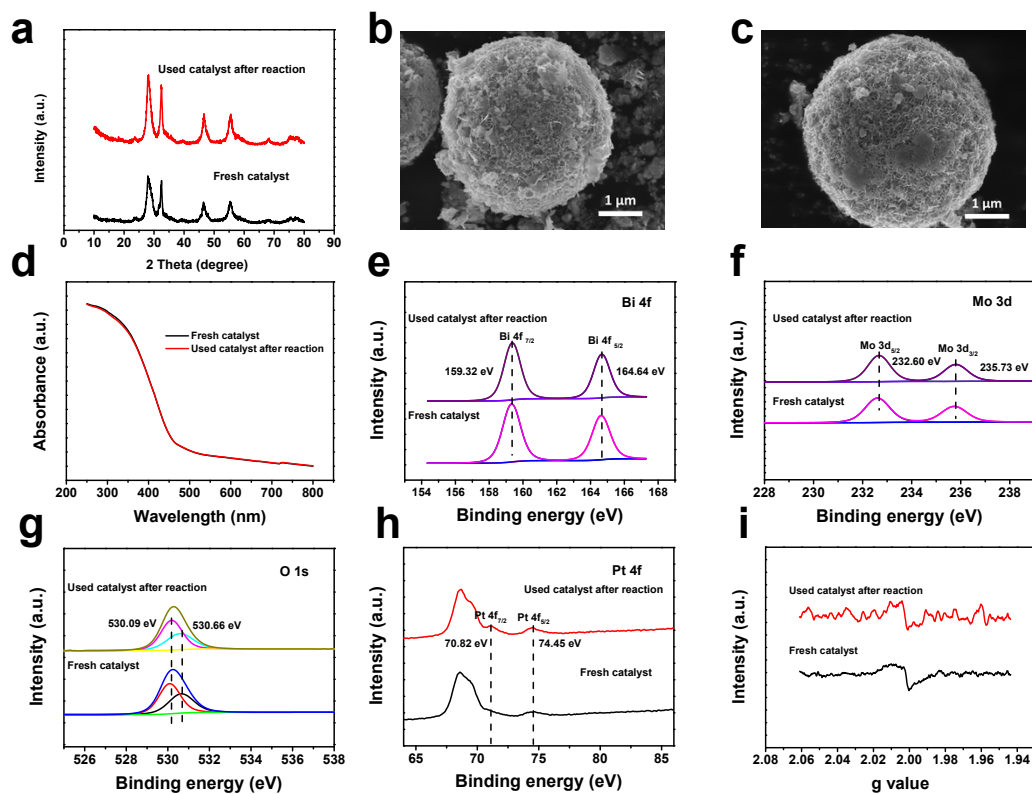

Fig. S4 Characterizations of Pt/Bi<sub>2</sub>MoO<sub>6</sub>-V<sub>O</sub> catalysts before and after the reaction. (a) XRD patterns of Pt/Bi<sub>2</sub>MoO<sub>6</sub>-V<sub>O</sub> samples before and after reaction. (b-c) SEM images of Pt/Bi<sub>2</sub>MoO<sub>6</sub>-V<sub>O</sub> samples before and after reaction. (d) UV-Visible spectra of Pt/Bi<sub>2</sub>MoO<sub>6</sub>-V<sub>O</sub> samples before and after reaction. (e-h) Bi 4f, Mo 3d, O 1s, and Pt 4f XPS spectra of Pt/Bi<sub>2</sub>MoO<sub>6</sub>-V<sub>O</sub> samples before and after reaction. (i) EPR spectra of Pt/Bi<sub>2</sub>MoO<sub>6</sub>-V<sub>O</sub> samples before and after reaction.



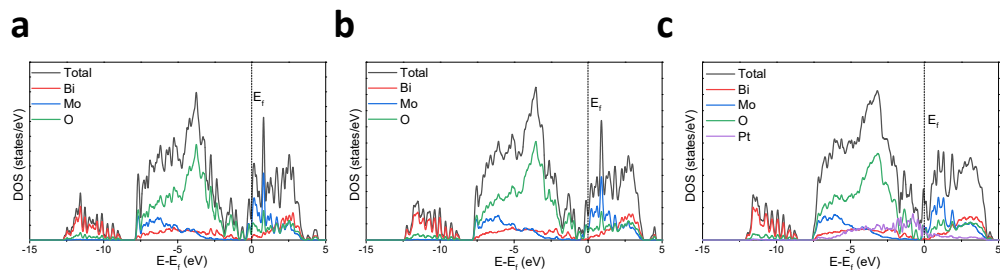

Fig. S5 Total and projected density of states (PDOS) of (a)  $\text{Bi}_2\text{MoO}_6$  (001) surface, (b)  $\text{Bi}_2\text{MoO}_6$  (001) surface with one oxygen vacancy, (c)  $\text{Bi}_2\text{MoO}_6$  (001) surface with one oxygen vacancy and  $\text{Pt}_{13}$  loading. The dashed lines represent that the Fermi level is set to 0 eV.
